# Supplementary material
Source: PubMed Central journal article supplement (PMC3257450)
Supplement: neo1312_1101SD1.pdf [file neo1312_1101SD1.pdf]

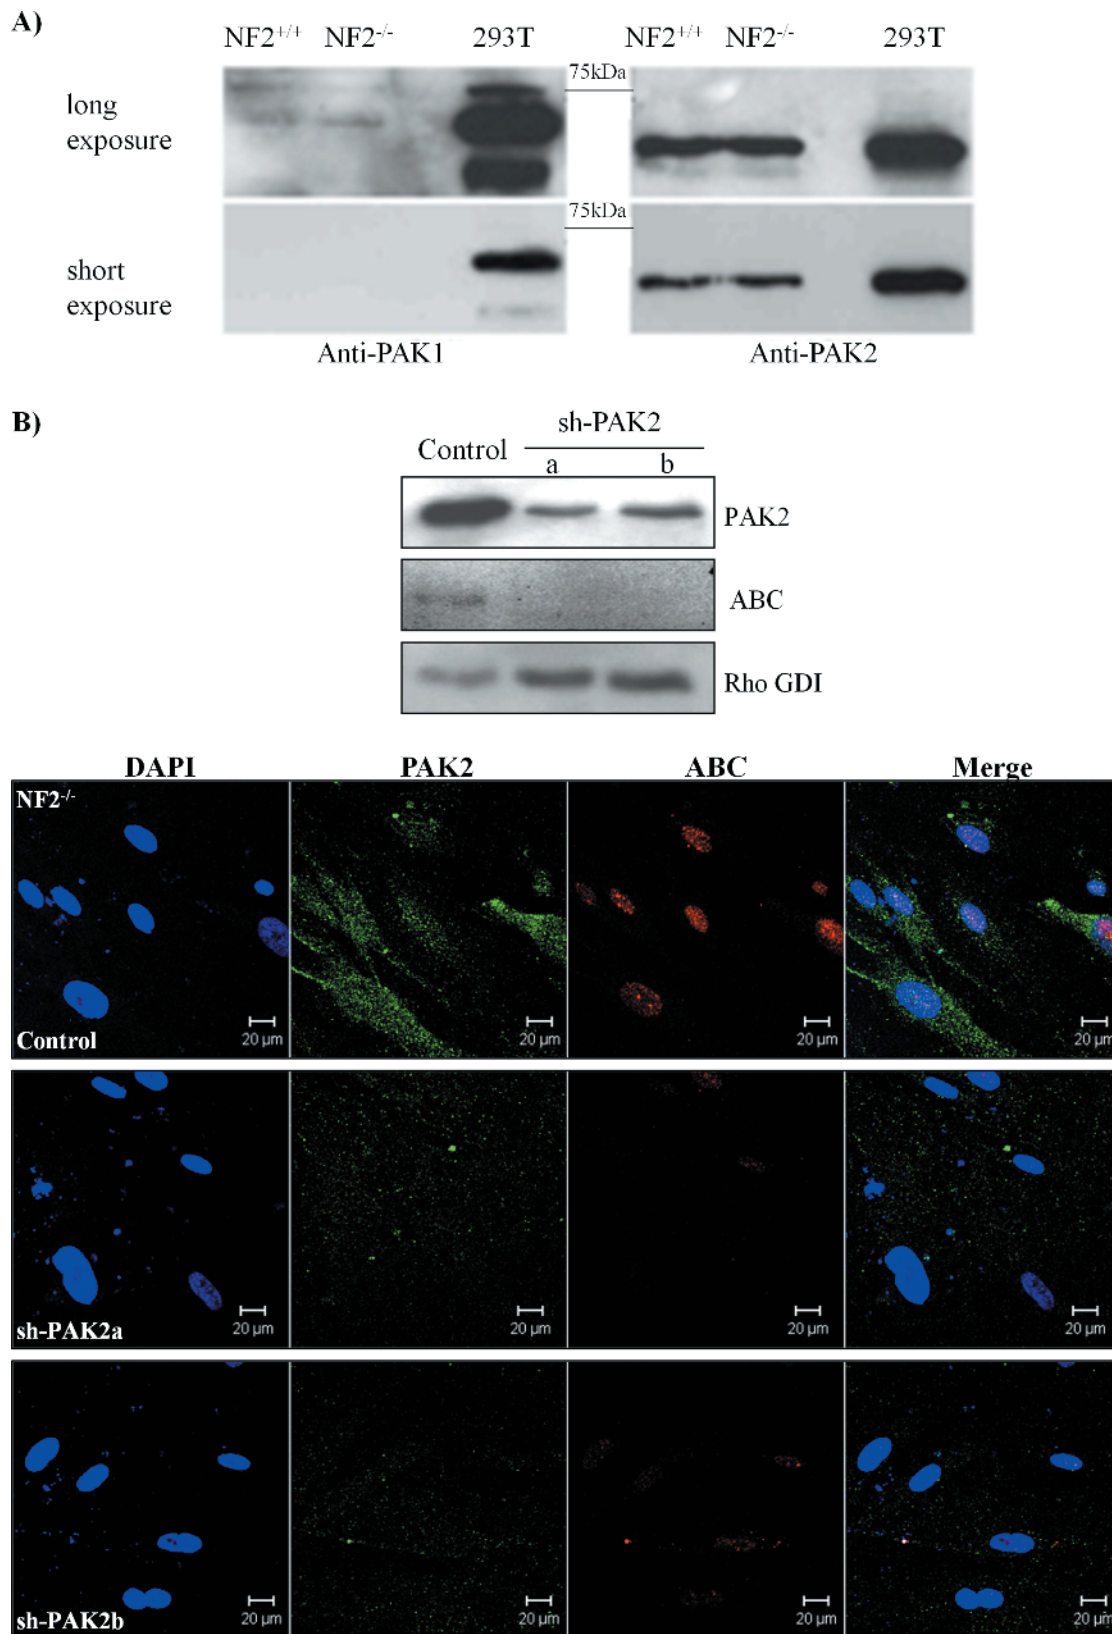

**Figure W1.** PAK2 is dominant in human Schwann and schwannoma cells. (A) The expression of PAK1 (68 kDa) and PAK2 (61 kDa) in Schwann (NF2<sup>+/+</sup>) and schwannoma cells (NF2<sup>-/-</sup>). The same amount of total proteins from NF2<sup>+/+</sup> and NF2<sup>-/-</sup> were loaded. Lysates from 293T cells were used as control. A long exposure (5 minutes) and a short exposure (30 seconds) of the same blot were compared. (B) Schwannoma cells were infected with shRNA encoding two sequences targeting human PAK2 (sh-PAK2a and sh-PAK2b) or a matched scramble sequence (Control). Infected cells were either blotted with anti-ABC or immunostained for DAPI, PAK2, and ABC. Scale bar, 20  $\mu$ m. RhoGDI served as a loading control for the Western blot. The Western blot and the nuclear staining of ABC were reduced in sh-PAK2a and sh-PAK2b compared with control.

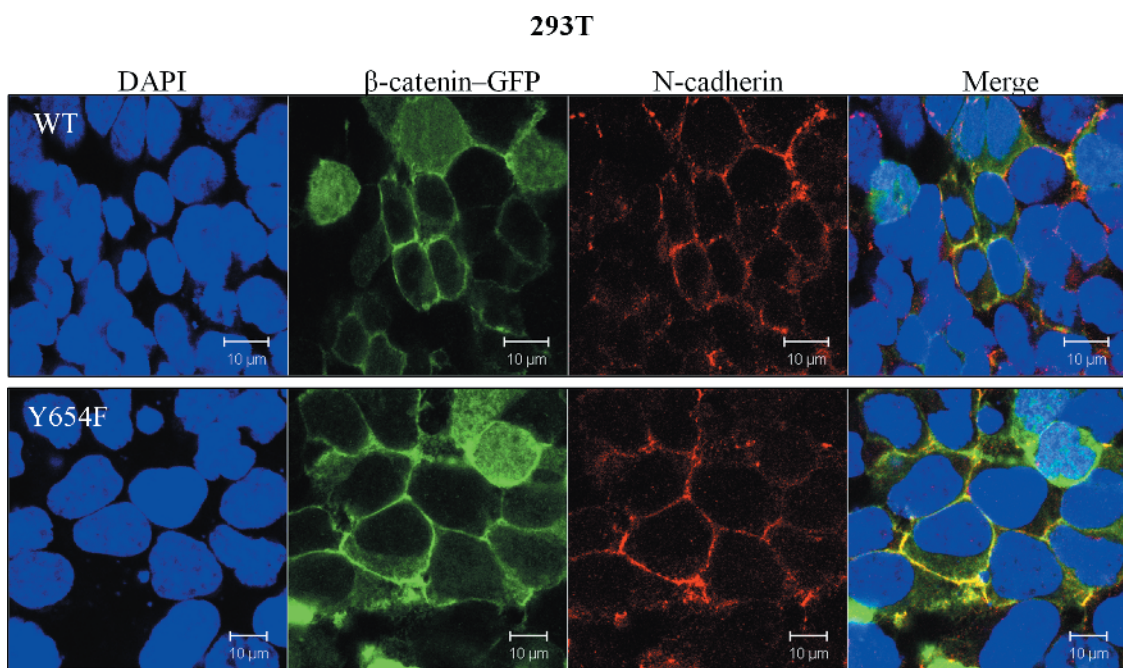

**Figure W2.** Specific transfection and immunostaining of N-cadherin and  $\beta$ -catenin. HEK293T cells were transfected with GFP fused  $\beta$ -catenin-WT and  $\beta$ -catenin-Y654F, cells were then immunostained with anti-N-cadherin and GFP antibodies. N-cadherin and  $\beta$ -catenin wild-type and mutant were both localized mainly in the adherent junctions and cytoplasm. No nuclear localization was observed for N-cadherin and  $\beta$ -catenin. Scale bar, 10  $\mu$ m.
